# Supplementary material
Source: publisher site journal article supplement (https://www.dovepress.com/article/315281)

## Experiment 1 Verification of six lncRNAs related with activation of microglia

### Group 1

sham  
MCAO

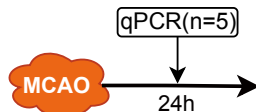

## Experiment 2 Time-course of *Neat1* expression after MCAO

### Group 2

sham  
MCAO

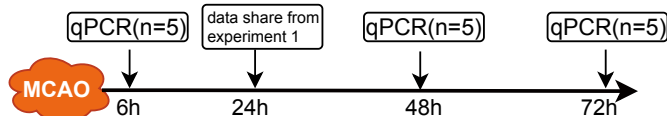

## Experiment 3 *Neat1* knockdown inhibited microglia activation and reduced brain damage after MCAO

### Group 3

sham  
MCAO  
ASO-NC  
ASO-*Neat1*

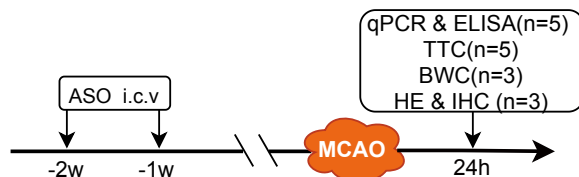

## Experiment 4 *Neat1* knockdown improved neurological function and reduced mortality after MCAO

### Group 4

MCAO  
ASO-NC  
ASO-*Neat1*

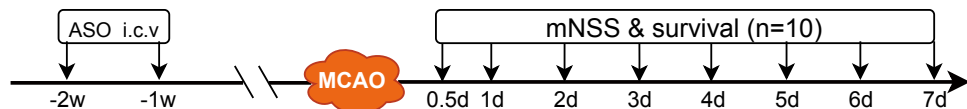

Supplement: Supplementary file 2 [file 315281-Revised-Figure-S2.pdf › 315281-Revised-Figure-S2.pdf]
