# Supplementary material
Source: publisher site journal article supplement (https://www.dovepress.com/article/315281)

**A**

*Mus musculus strain C57BL/6J chr19, GRCm39*

*Neat1\_2* 22,771 nt

*Neat1\_1* 3,190 nt

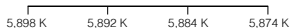**B**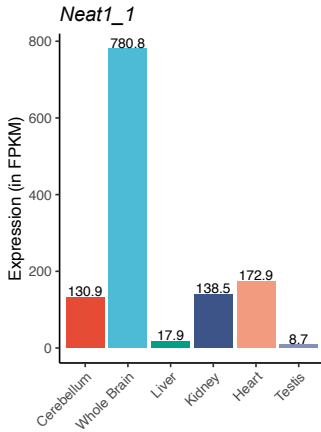

Supplement: Supplementary file 1 [file 315281-Revised-Figure-S1.pdf › 315281-Revised-Figure-S1.pdf]
